# Supplementary material
Source: publisher figshare collection journal article supplement (https://gsapubs.figshare.com/ndownloader/files/23354120)

PLATE 1: PRELIMINARY GEOLOGIC MAP OF THE SIERRA CALAMAJUE, BAJA CALIFORNIA, MEXICO

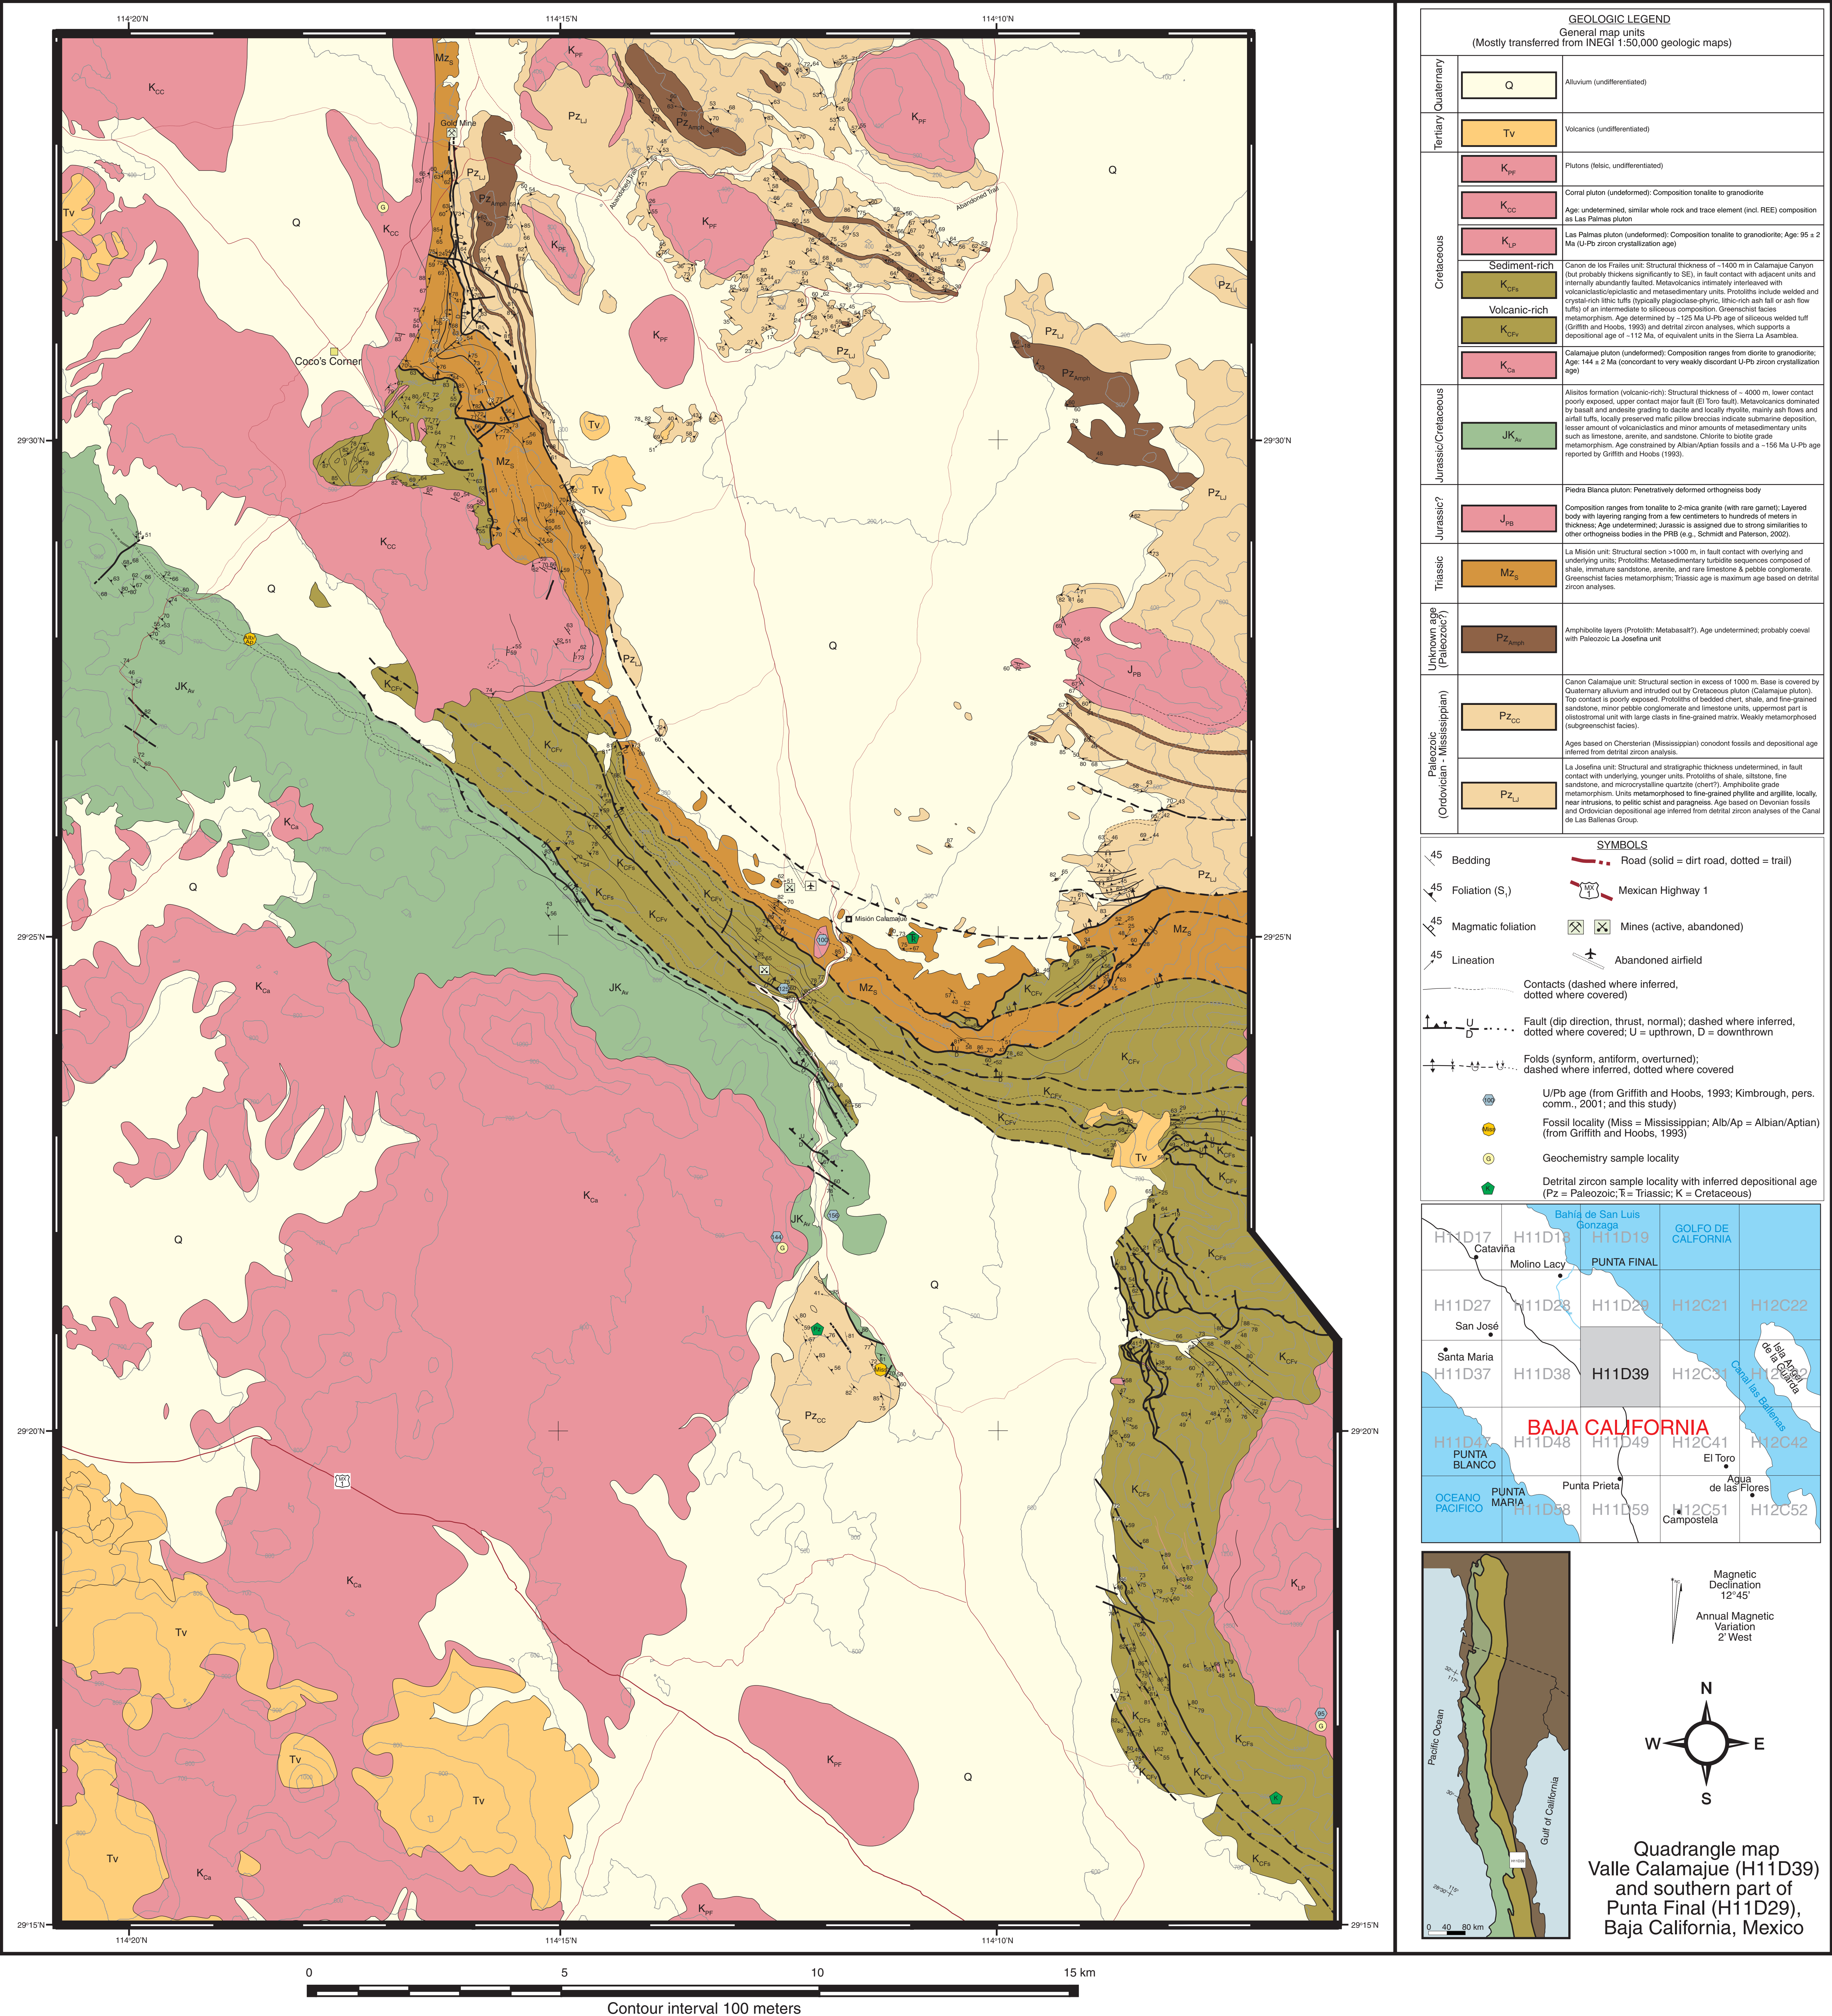

Supplement: Supplementary file 1 [file 23354120]
